# Supplementary material
Source: publisher figshare collection journal article supplement (https://acs.figshare.com/ndownloader/files/10933565)
Supplement: Supplementary file 1 [file 10933565]

## Supporting Information

### **Formation of CO<sub>2</sub> Hydrates within Single-Walled Carbon Nanotubes at Ambient Pressure: CO<sub>2</sub> Capture and Selective Separation of CO<sub>2</sub>/H<sub>2</sub> Mixture in Water**

Wenhui Zhao<sup>\*†</sup>, Jaeil Bai<sup>‡</sup>, Joseph S. Francisco<sup>‡</sup>, and Xiao Cheng Zeng<sup>\*‡,||</sup>

<sup>†</sup>*Department of Physics, Ningbo University, Ningbo 315211, China*

<sup>‡</sup>*Department of Chemistry, University of Nebraska-Lincoln, Lincoln, Nebraska 68588, USA*

<sup>||</sup>*Department of Chemical & Biomolecular Engineering and Department of Mechanical and Materials Engineering, University of Nebraska-Lincoln, Lincoln, Nebraska 68688, USA*

Corresponding authors<sup>\*</sup>: W.Z ([zhaowenhui@nbu.edu.cn](mailto:zhaowenhui@nbu.edu.cn)), X.C.Z ([xzeng1@unl.edu](mailto:xzeng1@unl.edu))

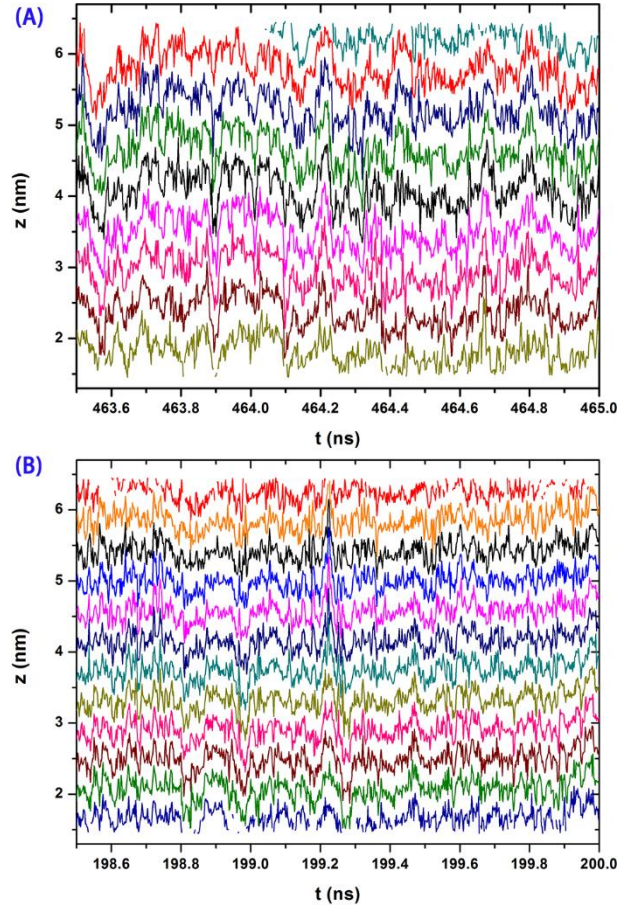

Figure S1. Motions  $z(t)$  of individual  $\text{CO}_2$  molecules along the nanotube axis shown as colored lines, inside the nanochannel of Q1D (A) octagonal and (B) nonagonal  $\text{CO}_2$  hydrates.

## 1. Computational Details

The zigzag SW-CNTs with two open ends are immersed into the dilute  $\text{CO}_2$  (or  $\text{CO}_2/\text{H}_2$ ) aqueous solution. All zigzag SW-CNTs have the length of 5.112 nm and their length is fixed during the simulations. And the lengths of (10, 10) and (12, 9) SWCNTs are 4.919 and 5.183 nm, respectively. Water molecules are described by the TIP3P model.<sup>S1</sup> Carbon atoms of SW-CNTs are modeled as uncharged Lennard-Jones (LJ) particles with graphite parameters of  $\epsilon_{\text{C}} = 0.3598$  kJ/mol and  $\sigma_{\text{C}} = 0.34$  nm.<sup>S2</sup>  $\text{H}_2$

molecules are described by a rigid two-center LJ model with a bond length of 0.074 nm and with the LJ parameters of  $\epsilon_H = 0.1039$  kJ/mol and  $\sigma_H = 0.259$  nm.<sup>S3</sup> The aqueous solution includes 4858 water molecules and 15 CO<sub>2</sub> molecules (and additional 15 H<sub>2</sub> molecules for the dilute CO<sub>2</sub>/H<sub>2</sub> aqueous solution). We also study the effect of the gas concentration difference. The results also show the high selectivity of CO<sub>2</sub> over H<sub>2</sub>. Indeed, the 1D gas hydrates in SW-CNTs are the ice nanotubes with gas molecules occupying the nanochannels. And the reason for the high selectivity of CO<sub>2</sub> over H<sub>2</sub> in the mixture solution is due to the much lower free-energy barrier of CO<sub>2</sub> to enter the SW-CNTs. Therefore, the formation of 1D gas hydrates within SW-CNTs and high selectivity of CO over H<sub>2</sub> are less affected by the ratio of number of water and guest molecules in the solution.

## 2. Calculation of CO<sub>2</sub> weight storage efficiency

The CO<sub>2</sub> weight storage efficiency for Q1D hydrate within SW-CNT is defined as:

$$\text{wt}\% = \frac{m_{\text{CO}_2}}{m_{\text{CO}_2} + m_{\text{water}} + m_{\text{CNT}}} \times 100\% \quad (1)$$

Here  $m_{\text{CO}_2}$  and  $m_{\text{water}}$  are the masses of CO<sub>2</sub> and water within SW-CNTs, and  $m_{\text{CNT}}$  is the mass of SW-CNT.

## 3. Potential of Mean Force (PMF) Calculation

The free-energy profile along the tube axis for the gas molecules is calculated by using the umbrella-sampling algorithm.<sup>S4,S5</sup> The force constant adopted for the harmonic biasing potential is 200 kJ mol<sup>-1</sup>nm<sup>2</sup> due to the weak interactions between gas molecule and water, particular between H<sub>2</sub> and water. The target positions vary from 0.4 nm to 3.6 nm at increments of 0.1 nm (the coordinate of the SW-CNT end is  $z \sim 1.5$  nm). A total of 32 simulations yield overlapping windows of density

probability. Each window is sampled for 4 ns and the last 2 ns of data are analyzed using the weighted histogram analysis method (WHAM).<sup>S4</sup> Note that all the umbrella-sampling simulations are carried out for the system being at a low temperature (200 K) with a stable polygonal ice nanotube when pulling the gas molecule.

### Supporting References

(S1) Jorgensen, W. J.; Chandrasekhar, J. D.; Madura, J. D.; Impey, R. W.; Klein, M. L. Comparison of Simple Potential Functions for Simulating Liquid Water. *J. Chem. Phys.* **1983**, 79, 926.

(S2) Hummer, G.; Rasaiah, J. C.; Noworyta, J. P. Water Conduction through the Hydrophobic Channel of a Carbon Nanotube. *Nature*, **2001**, 414, 188-190.

(S3) Cracknell, R. F. Molecular Simulation of Hydrogen Adsorption in Graphitic Nanofibres. *Phys. Chem. Chem. Phys.* **2001**, 3, 2091-2097.

(S4) Roux, B. The Calculation of the Potential of Mean Force Using Computer Simulations. *Comput. Phys. Commun.* **1995**, 91, 275-282.

(S5) Souaille, M.; Roux, B. Extension to the Weighted Histogram Analysis Method: Combining Umbrella Sampling with Free Energy Calculations. *Comput. Phys. Commun.* **2001**, 135, 40-57.
